# Supplementary material for: Decadal evolution of ship emissions in China from 2004 to 2013 by using an integrated AIS-based approach and projection to 2040
Source: Copernicus journal article supplement (doi:10.5194/acp-2017-743), 2017-10-09
Supplement: Supplementary file [file acp-2017-743-AC1-supplement.pdf]

Feb 13, 2018

Prof. Junyu Zheng  
Jinan University  
Guangzhou 511442, China  
Tel: +86-20-37336618, Fax: +86-20-37336618  
E-mail: zhengjunyu\_work@hotmail.com

Attn: Atmospheric Chemistry & Physics

Dear Prof. Ma:

Enclosed is a revised manuscript submitted for consideration of publication in Atmospheric Chemistry & Physics. The manuscript title is *Decadal evolution of ship emissions in China from 2004 to 2013 by using an integrated AIS-based approach and projection to 2040*.

We thank both reviewers for their valuable comments. This manuscript has been improved significantly by addressing these comments, and a detailed point-by-point response to all the comments is provided. All revisions made in the manuscript that correspond to comments are listed with line numbers to facilitate future examinations. Specifically, we have detailed the cargo-based approach in determining cargo volume and transport distance, complemented the major raw data and explained the representative of AIS data, added to calculate the results of black carbon (BC) and organic carbon (OC), and highlight the advantages of our approaches and results.

Should you have any questions to this work, please do not hesitate to contact us.

Yours sincerely,

Junyu Zheng  
Professor  
Institute for Environmental and Climate Research
